# Supplementary material for: Flavorless vs. Flavored Electronic Cigarette-Generated Aerosol and E-Liquid on the Growth of Common Oral Commensal Streptococci
Source: Front Physiol. 2020 Nov 23;11:585416. doi: 10.3389/fphys.2020.585416 (PMC7732452; doi:10.3389/fphys.2020.585416)
Supplement: Supplementary Table 1 — Means ± SD and n-values for all data points in the Kirby Bauer assays and in the bacterial growth curves. [file Table_1.XLSX]

## Sheet: Title
Supplemental Table 1. Means ± SD and n values for all data points
in the Kirby Bauer assays and in the bacterial growth curves.

## Sheet: Figure 2
Figure 2, Kirby Bauer Top Panel
		S. gordonii				S. intermedius				S. mitis				S. oralis
		Mean	SD	N		Mean	SD	N		Mean	SD	N		Mean	SD	N
Hydrogen Peroxide		19.6667	4.64579	3		17.3333	2.5658	3		24.1333	4.80139	3		22.3333	3.51188	3
Flavorless E-liquid		0	0	3		0	0	3		0	0	3		0	0	3
100% Tobacco		0	0	3		0	0	3		0	0	3		0	0	3
100% Menthol		9	1	3		8.66667	1.25831	3		11.0667	0.90185	3		8.66667	1.52753	3
100% Cinnamon		13.8333	2.46644	3		19.0667	3.10054	3		12.8333	3.17543	3		18.1667	0.763763	3
100% Strawberry		18.6667	0.57735	3		14.1667	2.02073	3		18.5	1.32288	3		20.6667	6.65833	3
100% Blueberry		0	0	3		0	0	3		0	0	3		0	0	3
Figure 2, Kirby Bauer Bottom Panel
		S. gordonni				S. intermedius				S. mitis				S. oralis
		Mean	SD	N		Mean	SD	N		Mean	SD	N		Mean	SD	N
Hydrogen Peroxide		19.6667	4.64579	3		17.3333	2.5658	3		24.1333	4.80139	3		22.3333	3.51188	3
Flavorless E-liquid		0	0	3		0	0	3		0	0	3		0	0	3
5% Tobacco		0	0	3		0	0	3		0	0	3		0	0	3
5% Menthol		0	0	3		0	0	3		2.36667	4.09919	3		0	0	3
5% Cinnamon		0	0	3		0	0	3		0	0	3		0	0	3
5% Strawberry		0	0	3		0	0	3		0	0	3		0	0	3
5% Blueberry		0	0	3		0	0	3		2.66667	4.6188	3		0	0	3

## Sheet: Figure 3
Figure 3, Effects of 100 µL E-Liquid
		S. gordonii
		Control				1% E-liquid				1% E-liquid (0.05% Tob)				1% E-liquid (0.05% Men)				1% E-liquid (0.05% Cin)				1% E-liquid (0.05% Str)				1% E-liquid (0.05% Blu)
Time		Mean	SD	N		Mean	SD	N		Mean	SD	N		Mean	SD	N		Mean	SD	N		Mean	SD	N		Mean	SD	N
0		0.00733333	0.00312856	12		0.00616667	0.00899832	12		0.00433333	0.00368864	12		0.00541667	0.00423102	12		0.00466667	0.00291807	12		0.00566667	0.0022088	12		0.0045	0.00321926	12
2		0.0255003	0.00442787	12		0.0183337	0.00961375	12		0.0160003	0.0057735	12		0.020917	0.00748483	12		0.0152503	0.00389541	12		0.0222503	0.00328795	12		0.0228337	0.00554049	12
4		0.459083	0.0625402	12		0.20975	0.0352145	12		0.310166	0.0575207	12		0.301166	0.0342782	12		0.284333	0.0423688	12		0.268083	0.0182558	12		0.26275	0.0311545	12
6		1.56	0.0455261	12		1.49758	0.0591621	12		1.58217	0.0464682	12		1.38325	0.11054	12		1.46242	0.142093	12		1.55625	0.0561958	12		1.48125	0.0611389	12
8		1.7015	0.034521	12		1.667	0.0463776	12		1.7155	0.0332301	12		1.77875	0.0436941	12		1.73075	0.0413641	12		1.6935	0.0314825	12		1.66425	0.0404238	12
24		1.84883	0.0130825	12		1.80875	0.0271543	12		1.82233	0.0162471	12		1.83158	0.0172229	12		1.82317	0.0199134	12		1.8275	0.00748737	12		1.83692	0.0216002	12
		S. intermedius
		Control				1% E-liquid				1% E-liquid (0.05% Tob)				1% E-liquid (0.05% Men)				1% E-liquid (0.05% Cin)				1% E-liquid (0.05% Str)				1% E-liquid (0.05% Blu)
Time		Mean	SD	N		Mean	SD	N		Mean	SD	N		Mean	SD	N		Mean	SD	N		Mean	SD	N		Mean	SD	N
0		-0.00708367	0.00218812	12		-0.00233367	0.00853291	12		0.00174967	0.0146028	12		-0.003917	0.00396576	12		-0.00225033	0.00216725	12		-0.00483367	0.00223437	12		-0.00400033	0.00167649	12
2		-0.00749967	0.00249848	12		-0.00291633	0.00801655	12		0.00233367	0.0140508	12		0.0508337	0.0187536	12		0.007917	0.00537883	12		0.0147503	0.00580687	12		0.0200837	0.00377692	12
4		0.19175	0.0522926	12		0.349	0.0612008	12		0.319334	0.0721255	12		0.823167	0.0739485	12		0.134667	0.0407032	12		0.441917	0.139444	12		0.307584	0.0583272	12
6		1.01792	0.0637672	12		1.09658	0.0274076	12		1.12892	0.0640134	12		1.298	0.0498087	12		1.01567	0.090184	12		1.15442	0.0666258	12		1.1485	0.0312512	12
8		1.38108	0.0352222	12		1.31583	0.0317417	12		1.30033	0.065471	12		1.35317	0.0474733	12		1.54883	0.0271777	12		1.34725	0.052325	12		1.25842	0.0240618	12
24		1.3955	0.026373	12		1.29883	0.0848004	12		1.37208	0.082937	12		1.259	0.0413575	12		1.58183	0.0153394	12		1.21808	0.0216795	12		1.19242	0.00833757	12
		S. mitis
		Control				1% E-liquid				1% E-liquid (0.05% Tob)				1% E-liquid (0.05% Men)				1% E-liquid (0.05% Cin)				1% E-liquid (0.05% Str)				1% E-liquid (0.05% Blu)
Time		Mean	SD	N		Mean	SD	N		Mean	SD	N		Mean	SD	N		Mean	SD	N		Mean	SD	N		Mean	SD	N
0		0.00291633	0.00287096	12		0.002833	0.00195982	12		0.00199967	0.00398767	12		0.0132497	0.00320038	12		0.00349967	0.00305877	12		0.00399967	0.00320393	12		0.00316633	0.00156428	12
2		0.015167	0.00398006	12		0.0140003	0.00403301	12		0.011917	0.00672174	12		0.031417	0.00612001	12		0.013417	0.00766337	12		0.019667	0.00338781	12		0.021917	0.00183402	12
4		0.29275	0.0274992	12		0.19125	0.0254777	12		0.194083	0.0551946	12		0.311083	0.0308647	12		0.14625	0.0139618	12		0.216417	0.0154064	12		0.239833	0.0152067	12
6		1.45392	0.030637	12		1.45967	0.0434089	12		1.44683	0.0723581	12		1.55983	0.138029	12		1.10833	0.0449501	12		1.46275	0.0470766	12		1.4625	0.0217004	12
8		1.6575	0.018587	12		1.69733	0.0263593	12		1.68967	0.0489776	12		1.902	0.0467316	12		1.69675	0.0531054	12		1.70633	0.0305806	12		1.66025	0.012972	12
24		1.83658	0.0096515	12		1.81742	0.0139924	12		1.80242	0.0248955	12		1.93517	0.0328729	12		1.82142	0.0116137	12		1.85142	0.0270314	12		1.8545	0.00621033	12
		S. oralis
		Control				1% E-liquid				1% E-liquid (0.05% Tob)				1% E-liquid (0.05% Men)				1% E-liquid (0.05% Cin)				1% E-liquid (0.05% Str)				1% E-liquid (0.05% Blu)
Time		Mean	SD	N		Mean	SD	N		Mean	SD	N		Mean	SD	N		Mean	SD	N		Mean	SD	N		Mean	SD	N
0		0.007583	0.00345095	12		0.007583	0.00227636	12		0.00691633	0.00185047	12		0.00891633	0.00189896	12		0.00841633	0.00360135	12		0.00949967	0.00219331	12		0.0139163	0.00496961	12
2		0.0178333	0.00365459	12		0.0175833	0.00234844	12		0.017	0.00234036	12		0.01975	0.0032891	12		0.0185	0.0046147	12		0.021	0.00304885	12		0.0403333	0.0111474	12
4		0.222917	0.0108962	12		0.194584	0.00990256	12		0.184417	0.0110659	12		0.187167	0.0109638	12		0.161834	0.0111474	12		0.22575	0.00781413	12		0.264834	0.025087	12
6		1.18375	0.0357172	12		1.18925	0.0441206	12		1.17642	0.0391457	12		1.43083	0.166771	12		1.4625	0.25252	12		1.35908	0.0755855	12		1.38758	0.0974954	12
8		1.58267	0.0131849	12		1.62458	0.0168784	12		1.60933	0.0200792	12		1.73958	0.0279799	12		1.76317	0.0299033	12		1.63458	0.0219082	12		1.66208	0.0337324	12
24		1.86725	0.00986692	12		1.82542	0.0111202	12		1.87742	0.0368144	12		1.8935	0.0476356	12		1.88308	0.0479061	12		1.82842	0.00971528	12		1.85992	0.0108889	12
Figure 3, Effects of 100 Puffs of E-Liquid Aerosol
		S. gordonii
		Control				Air				1% E-liquid				1% E-liquid (0.05% Tob)				1% E-liquid (0.05% Men)				1% E-liquid (0.05% Cin)				1% E-liquid (0.05% Str)				1% E-liquid (0.05% Blu)
Time		Mean	SD	N		Mean	SD	N		Mean	SD	N		Mean	SD	N		Mean	SD	N		Mean	SD	N		Mean	SD	N		Mean	SD	N
0		0.00783367	0.00274552	12		0.00850033	0.0024293	12		0.00658367	0.00377391	12		0.00525033	0.00280692	12		0.009167	0.00128806	12		0.0120003	0.00246644	12		0.005667	0.00313702	12		0.00500033	0.00435803	12
2		0.04075	0.00816868	12		0.0420833	0.00526279	12		0.02675	0.00590839	12		0.0245	0.00541253	12		0.0451667	0.00615642	12		0.0490833	0.00564613	12		0.0375833	0.00584393	12		0.0438333	0.00555073	12
4		0.52325	0.10112	12		0.53125	0.030345	12		0.2395	0.0462073	12		0.235417	0.0402996	12		0.270333	0.0187251	12		0.18925	0.0189473	12		0.187667	0.0128944	12		0.318417	0.0299889	12
6		1.53433	0.0423692	12		1.69025	0.0422592	12		1.56642	0.0433285	12		1.56167	0.0455099	12		1.6775	0.032129	12		0.924333	0.0469087	12		1.345	0.0529476	12		1.53358	0.0898863	12
8		1.69933	0.0352351	12		1.81575	0.0304256	12		1.74383	0.0343295	12		1.74483	0.031223	12		1.84075	0.0305806	12		1.79167	0.0275384	12		1.70183	0.0329706	12		1.75308	0.0328176	12
24		1.85092	0.0147162	12		1.85525	0.00782141	12		1.84358	0.0247844	12		1.8295	0.0274071	12		1.88242	0.0261121	12		1.85742	0.0138834	12		1.80958	0.0124204	12		1.84442	0.0218138	12
		S. intermedius
		Control				Air				1% E-liquid				1% E-liquid (0.05% Tob)				1% E-liquid (0.05% Men)				1% E-liquid (0.05% Cin)				1% E-liquid (0.05% Str)				1% E-liquid (0.05% Blu)
Time		Mean	SD	N		Mean	SD	N		Mean	SD	N		Mean	SD	N		Mean	SD	N		Mean	SD	N		Mean	SD	N		Mean	SD	N
0		-0.00541667	0.00234844	12		-0.00433333	0.00425245	12		-0.00241667	0.00365148	12		-0.00408333	0.00479267	12		-0.00883333	0.00290637	12		-0.00675	0.00402266	12		-0.00716667	0.00416606	12		-0.00141667	0.0127446	12
2		-0.00391667	0.0034859	12		-0.00275	0.00500908	12		-0.00475	0.00888308	12		0.00516667	0.00857542	12		0.00225	0.00565685	12		-0.00175	0.0053428	12		-0.0035	0.00551238	12		0.0145833	0.0119722	12
4		0.250334	0.0399996	12		0.39875	0.060084	12		0.038417	0.0133289	12		0.305417	0.0733375	12		0.425	0.104546	12		0.19325	0.0450564	12		0.36875	0.076169	12		0.147417	0.0186212	12
6		0.962833	0.047858	12		1.04942	0.0652615	12		0.422833	0.0391248	12		1.16958	0.0965288	12		1.17942	0.0645387	12		1.01758	0.0545277	12		1.24042	0.0437302	12		0.98275	0.0376994	12
8		1.35575	0.0363318	12		1.29025	0.0299439	12		1.12692	0.0436637	12		1.30775	0.0602042	12		1.29425	0.0439804	12		1.53025	0.0400057	12		1.4055	0.020046	12		1.36875	0.0309809	12
24		1.38667	0.0292911	12		1.20242	0.0415527	12		1.56892	0.0205668	12		1.30108	0.0456916	12		1.2775	0.066353	12		1.54442	0.0262694	12		1.35917	0.0600217	12		1.47492	0.0207121	12
		S. mitis
		Control				Air				1% E-liquid				1% E-liquid (0.05% Tob)				1% E-liquid (0.05% Men)				1% E-liquid (0.05% Cin)				1% E-liquid (0.05% Str)				1% E-liquid (0.05% Blu)
Time		Mean	SD	N		Mean	SD	N		Mean	SD	N		Mean	SD	N		Mean	SD	N		Mean	SD	N		Mean	SD	N		Mean	SD	N
0		0.00241633	0.00178164	12		0.00224967	0.0011645	12		0.005083	0.00559423	12		0.00216633	0.00312856	12		0.0114163	0.00758537	12		0.0104997	0.00189896	12		0.00849967	0.00275791	12		0.00824967	0.00131137	12
2		0.0195833	0.00305877	12		0.0179167	0.00172986	12		0.0139167	0.00741569	12		0.01475	0.0140979	12		0.02825	0.00708552	12		0.0266667	0.00452937	12		0.0200833	0.0030289	12		0.02225	0.00402549	12
4		0.306667	0.0519763	12		0.259667	0.0847053	12		0.11275	0.0339183	12		0.135167	0.0299802	12		0.306833	0.0255359	12		0.255833	0.0311987	12		0.155	0.0351054	12		0.25175	0.0118129	12
6		1.46592	0.0202998	12		1.53267	0.0163725	12		1.087	0.0313378	12		1.16483	0.0520376	12		1.6615	0.04803	12		1.52342	0.020699	12		1.18433	0.0395888	12		1.52675	0.0340626	12
8		1.64833	0.0178699	12		1.71058	0.0216562	12		1.65917	0.024168	12		1.67592	0.0323113	12		1.80275	0.0450787	12		1.73692	0.012099	12		1.67508	0.0237887	12		1.76442	0.0118944	12
24		1.83917	0.00606031	12		1.82009	0.00927813	12		1.80975	0.0213007	12		1.83084	0.0386907	12		1.89292	0.0293571	12		1.88375	0.0444695	12		1.82592	0.0186261	12		1.85909	0.00811797	12
		S. oralis
		Control				Air				1% E-liquid				1% E-liquid (0.05% Tob)				1% E-liquid (0.05% Men)				1% E-liquid (0.05% Cin)				1% E-liquid (0.05% Str)				1% E-liquid (0.05% Blu)
Time		Mean	SD	N		Mean	SD	N		Mean	SD	N		Mean	SD	N		Mean	SD	N		Mean	SD	N		Mean	SD	N		Mean	SD	N
0		0.00708367	0.00162135	12		-0.000499667	0.00275791	12		-0.000916333	0.00394181	12		0.00600033	0.00741416	12		-0.00216633	0.00236771	12		0.000583667	0.00365459	12		0.007667	0.0209848	12		0.00150033	0.00452936	12
2		0.02175	0.0027798	12		0.0135	0.00357071	12		0.00625	0.00575247	12		0.0295	0.0108135	12		0.00675	0.0034772	12		0.00875	0.00360555	12		0.0180833	0.0210231	12		0.0124167	0.00511385	12
4		0.244583	0.0162432	12		0.21275	0.0134127	12		0.089583	0.0142518	12		0.145083	0.0190173	12		0.132	0.0106757	12		0.131666	0.0146401	12		0.164833	0.0225106	12		0.170416	0.0115794	12
6		1.24158	0.0454622	12		1.32558	0.0488382	12		0.5285	0.0355374	12		0.682167	0.0778686	12		1.40442	0.273179	12		0.819083	0.0351218	12		1.4395	0.189959	12		1.01992	0.265323	12
8		1.6055	0.023566	12		1.61683	0.0329935	12		1.70192	0.0564122	12		1.74325	0.0421768	12		1.73083	0.0769936	12		1.63233	0.0238675	12		1.73208	0.0520035	12		1.62308	0.0584326	12
24		1.87592	0.00732162	12		1.83792	0.0146463	12		1.80033	0.0208114	12		1.85575	0.049373	12		1.82383	0.0252915	12		1.80192	0.0112721	12		1.81383	0.0134781	12		1.825	0.00923883	12

## Sheet: Figure 6
Figure 6, Low Dose Reponse Growth Curves
S. gordonii
	Flavorless E-liquid
Time	Control				1.25% E-liquid				2.5% E-liquid				5% E-liquid				5% E-liquid (0.25% Peroxide)
	Mean	SD	N		Mean	SD	N		Mean	SD	N		Mean	SD	N		Mean	SD	N
0	0.08375	0.000500001	4		0.0855	0.00310913	4		0.081	0.0011547	4		0.0795	0.000999998	4		0.06325	0.00585235	4
2	0.248	0.00244948	4		0.24625	0.0060208	4		0.2075	0.00331662	4		0.143	0.00141421	4		0.056	0.00408248	4
4	0.56875	0.011471	4		0.58075	0.0173469	4		0.52025	0.0186793	4		0.46825	0.00670198	4		0.05725	0.00457347	4
6	0.635	0.0134907	4		0.657	0.0234521	4		0.6035	0.0106615	4		0.55675	0.0104043	4		0.05725	0.00543905	4
8	0.67675	0.0225	4		0.68575	0.0306526	4		0.65525	0.00613053	4		0.594	0.00783155	4		0.05675	0.000957425	4
10	0.671	0.0082462	4		0.662	0.00848529	4		0.64675	0.00670198	4		0.61475	0.00818026	4		0.054	0.000816497	4
24	0.6845	0.0251992	4		0.745	0.0369414	4		0.70575	0.022882	4		0.59675	0.00853913	4		0.053	0.000816497	4
	Tobacco
Time	Control				1.25% E-liquid (0.0625% Tob)				2.5% E-liquid (0.125% Tob)				5% E-liquid (0.25% Tob)				5% E-liquid (0.25% Peroxide)
	Mean	SD	N		Mean	SD	N		Mean	SD	N		Mean	SD	N		Mean	SD	N
0	0.08375	0.000500001	4		0.08475	0.000500001	4		0.08325	0.00189297	4		0.08175	0.0015	4		0.06325	0.00585235	4
2	0.248	0.00244948	4		0.25575	0.00713559	4		0.228	0.0033665	4		0.167	0.00163299	4		0.056	0.00408248	4
4	0.56875	0.011471	4		0.55775	0.0170563	4		0.549	0.0187083	4		0.5185	0.00929156	4		0.05725	0.00457347	4
6	0.635	0.0134907	4		0.64625	0.0306526	4		0.5845	0.0156098	4		0.53525	0.00512348	4		0.05725	0.00543905	4
8	0.67675	0.0225	4		0.66725	0.0287446	4		0.6595	0.0122338	4		0.60675	0.00590903	4		0.05675	0.000957425	4
10	0.671	0.0082462	4		0.65275	0.00754432	4		0.6295	0.00420318	4		0.61525	0.00895825	4		0.054	0.000816497	4
24	0.6845	0.0251992	4		0.7405	0.0336402	4		0.7	0.0149889	4		0.557	0.00326599	4		0.053	0.000816497	4
	Menthol
Time	Control				1.25% E-liquid (0.0625% Men)				2.5% E-liquid (0.125% Men)				5% E-liquid (0.25% Men)				5% E-liquid (0.25% Peroxide)
	Mean	SD	N		Mean	SD	N		Mean	SD	N		Mean	SD	N		Mean	SD	N
0	0.08375	0.000500001	4		0.08625	0.00170783	4		0.0835	0.00129099	4		0.08225	0.00170783	4		0.06325	0.00585235	4
2	0.248	0.00244948	4		0.26	0.00804156	4		0.21925	0.0025	4		0.159	0.00668331	4		0.056	0.00408248	4
4	0.56875	0.011471	4		0.6055	0.0294901	4		0.621	0.00594419	4		0.52575	0.026663	4		0.05725	0.00457347	4
6	0.635	0.0134907	4		0.6755	0.0327567	4		0.6645	0.00532291	4		0.58775	0.0435306	4		0.05725	0.00543905	4
8	0.67675	0.0225	4		0.6685	0.0295804	4		0.69325	0.0129454	4		0.623	0.0104243	4		0.05675	0.000957425	4
10	0.671	0.0082462	4		0.681	0.0182026	4		0.6505	0.00331661	4		0.60775	0.00684957	4		0.054	0.000816497	4
24	0.6845	0.0251992	4		0.77475	0.0619966	4		0.74925	0.00478713	4		0.59675	0.0238939	4		0.053	0.000816497	4
	Cinnamon
Time	Control				1.25% E-liquid (0.0625% Cin)				2.5% E-liquid (0.125% Cin)				5% E-liquid (0.25% Cin)				5% E-liquid (0.25% Peroxide)
	Mean	SD	N		Mean	SD	N		Mean	SD	N		Mean	SD	N		Mean	SD	N
0	0.08375	0.000500001	4		0.08475	0.000250001	4		0.0845	0.000288676	4		0.08325	0.000478713	4		0.06325	0.00585235	4
2	0.248	0.00244948	4		0.24225	0.00137689	4		0.20125	0.000853912	4		0.149	0.00108012	4		0.056	0.00408248	4
4	0.56875	0.011471	4		0.59025	0.0139784	4		0.60125	0.00372771	4		0.467	0.0134226	4		0.05725	0.00457347	4
6	0.635	0.0134907	4		0.66425	0.0167897	4		0.66125	0.00586479	4		0.601	0.0148829	4		0.05725	0.00543905	4
8	0.67675	0.0225	4		0.6595	0.00735414	4		0.69175	0.00663795	4		0.63425	0.00985203	4		0.05675	0.000957425	4
10	0.671	0.0082462	4		0.6825	0.012842	4		0.664	0.00227304	4		0.61775	0.00370529	4		0.054	0.000816497	4
24	0.6845	0.0251992	4		0.777	0.0303562	4		0.777	0.00371932	4		0.63775	0.019712	4		0.053	0.000816497	4
	Strawberry
Time	Control				1.25% E-liquid (0.0625% Str)				2.5% E-liquid (0.125% Str)				5% E-liquid (0.25% Str)				5% E-liquid (0.25% Peroxide)
	Mean	SD	N		Mean	SD	N		Mean	SD	N		Mean	SD	N		Mean	SD	N
0	0.08375	0.000500001	4		0.08775	0.00275378	4		0.08475	0.000500001	4		0.0835	0.00173205	4		0.06325	0.00585235	4
2	0.248	0.00244948	4		0.26475	0.00639661	4		0.2295	0.00369684	4		0.167	0.00454606	4		0.056	0.00408248	4
4	0.56875	0.011471	4		0.60325	0.0293641	4		0.6085	0.00404146	4		0.5475	0.028101	4		0.05725	0.00457347	4
6	0.635	0.0134907	4		0.67975	0.0318682	4		0.6705	0.00850492	4		0.59225	0.0448878	4		0.05725	0.00543905	4
8	0.67675	0.0225	4		0.67575	0.0184097	4		0.6755	0.0131276	4		0.611	0.0129872	4		0.05675	0.000957425	4
10	0.671	0.0082462	4		0.6825	0.0127672	4		0.652	0.00707106	4		0.6085	0.0112694	4		0.054	0.000816497	4
24	0.6845	0.0251992	4		0.744	0.0274348	4		0.7185	0.00741619	4		0.6025	0.0323574	4		0.053	0.000816497	4
	Blueberry
Time	Control				1.25% E-liquid (0.0625% Blu)				2.5% E-liquid (0.125% Blu)				5% E-liquid (0.25% Blu)				5% E-liquid (0.25% Peroxide)
	Mean	SD	N		Mean	SD	N		Mean	SD	N		Mean	SD	N		Mean	SD	N
0	0.08375	0.000500001	4		0.08525	0.000500001	4		0.08225	0.000499997	4		0.08225	0.00189297	4		0.06325	0.00585235	4
2	0.248	0.00244948	4		0.25025	0.0015	4		0.2115	0.00251661	4		0.15	0.00374166	4		0.056	0.00408248	4
4	0.56875	0.011471	4		0.598	0.0220454	4		0.6075	0.00873688	4		0.52525	0.0391439	4		0.05725	0.00457347	4
6	0.635	0.0134907	4		0.67775	0.0324384	4		0.67125	0.00745541	4		0.592	0.0461808	4		0.05725	0.00543905	4
8	0.67675	0.0225	4		0.6785	0.026839	4		0.7015	0.0106614	4		0.6315	0.0285248	4		0.05675	0.000957425	4
10	0.671	0.0082462	4		0.682	0.0169115	4		0.648	0.00509903	4		0.6125	0.00310914	4		0.054	0.000816497	4
24	0.6845	0.0251992	4		0.798	0.0808991	4		0.75275	0.0152616	4		0.61525	0.0288372	4		0.053	0.000816497	4
S. intermedious
	Flavorless E-liquid
Time	Control				1.25% E-liquid				2.5% E-liquid				5% E-liquid				5% E-liquid (0.25% Peroxide)
	Mean	SD	N		Mean	SD	N		Mean	SD	N		Mean	SD	N		Mean	SD	N
0	0.07575	0.00190863	8		0.077375	0.00272226	8		0.07375	0.000462911	8		0.072875	0.000353554	8		0.059625	0.00130247	8
2	0.085125	0.00229518	8		0.086625	0.00406861	8		0.0815	0.00244949	8		0.07775	0.00148805	8		0.0555	0.00092582	8
4	0.162125	0.00496955	8		0.144875	0.00766136	8		0.121375	0.00759581	8		0.1005	0.00250713	8		0.054875	0.00279987	8
6	0.499625	0.0129718	8		0.439875	0.0153942	8		0.31	0.0289433	8		0.166	0.010198	8		0.05425	0.00166905	8
8	0.590375	0.00803453	8		0.555875	0.00598659	8		0.48925	0.0126914	8		0.354375	0.0229903	8		0.05425	0.00212132	8
10	0.639	0.0150997	8		0.597	0.00723091	8		0.543625	0.0101972	8		0.482375	0.0216791	8		0.053625	0.00282527	8
24	0.753125	0.0253515	8		0.65325	0.0563554	8		0.620125	0.0201171	8		0.55425	0.0301413	8		0.051625	0.00255999	8
	Tobacco
Time	Control				1.25% E-liquid (0.0625% Tob)				2.5% E-liquid (0.125% Tob)				5% E-liquid (0.25% Tob)				5% E-liquid (0.25% Peroxide)
	Mean	SD	N		Mean	SD	N		Mean	SD	N		Mean	SD	N		Mean	SD	N
0	0.07575	0.00190863	8		0.074875	0.00145774	8		0.07475	0.000707106	8		0.074875	0.00172689	8		0.059625	0.00130247	8
2	0.085125	0.00229518	8		0.088	0.00106905	8		0.085875	0.000991031	8		0.08125	0.00175255	8		0.0555	0.00092582	8
4	0.162125	0.00496955	8		0.15975	0.0122678	8		0.139625	0.00937988	8		0.111875	0.00415546	8		0.054875	0.00279987	8
6	0.499625	0.0129718	8		0.463625	0.0340879	8		0.365375	0.0321111	8		0.1995	0.0154919	8		0.05425	0.00166905	8
8	0.590375	0.00803453	8		0.560625	0.0142422	8		0.50375	0.0191964	8		0.398625	0.0223347	8		0.05425	0.00212132	8
10	0.639	0.0150997	8		0.59775	0.0119493	8		0.554875	0.0141768	8		0.507125	0.00743423	8		0.053625	0.00282527	8
24	0.753125	0.0253515	8		0.677375	0.0329629	8		0.59925	0.0210221	8		0.5425	0.031776	8		0.051625	0.00255999	8
	Menthol
Time	Control				1.25% E-liquid (0.0625% Men)				2.5% E-liquid (0.125% Men)				5% E-liquid (0.25% Men)				5% E-liquid (0.25% Peroxide)
	Mean	SD	N		Mean	SD	N		Mean	SD	N		Mean	SD	N		Mean	SD	N
0	0.07575	0.00190863	8		0.076375	0.00140789	8		0.07475	0.00128174	8		0.074125	0.00172689	8		0.059625	0.00130247	8
2	0.085125	0.00229518	8		0.0875	0.00106904	8		0.085	0.00075593	8		0.0805	0.00220389	8		0.0555	0.00092582	8
4	0.162125	0.00496955	8		0.15875	0.0127923	8		0.133875	0.00540998	8		0.106625	0.00315945	8		0.054875	0.00279987	8
6	0.499625	0.0129718	8		0.46475	0.0240401	8		0.334	0.0257848	8		0.18275	0.00436708	8		0.05425	0.00166905	8
8	0.590375	0.00803453	8		0.567125	0.0148559	8		0.490375	0.0166041	8		0.38725	0.0103337	8		0.05425	0.00212132	8
10	0.639	0.0150997	8		0.597125	0.0184812	8		0.552125	0.0227247	8		0.491625	0.0259722	8		0.053625	0.00282527	8
24	0.753125	0.0253515	8		0.6965	0.116787	8		0.6675	0.0235493	8		0.59425	0.0310978	8		0.051625	0.00255999	8
	Cinnamon
Time	Control				1.25% E-liquid (0.0625% Cin)				2.5% E-liquid (0.125% Cin)				5% E-liquid (0.25% Cin)				5% E-liquid (0.25% Peroxide)
	Mean	SD	N		Mean	SD	N		Mean	SD	N		Mean	SD	N		Mean	SD	N
0	0.07575	0.00190863	8		0.076375	0.000916126	8		0.07575	0.0010351	8		0.0765	0.00141421	8		0.059625	0.00130247	8
2	0.085125	0.00229518	8		0.08675	0.0010351	8		0.084125	0.000991033	8		0.080625	0.00206588	8		0.0555	0.00092582	8
4	0.162125	0.00496955	8		0.152	0.0105289	8		0.13625	0.00662786	8		0.103625	0.00159799	8		0.054875	0.00279987	8
6	0.499625	0.0129718	8		0.455125	0.0238952	8		0.345375	0.0292767	8		0.175625	0.00471888	8		0.05425	0.00166905	8
8	0.590375	0.00803453	8		0.568625	0.0203255	8		0.5145	0.00896022	8		0.369875	0.00997765	8		0.05425	0.00212132	8
10	0.639	0.0150997	8		0.599625	0.0128945	8		0.56925	0.0160334	8		0.4935	0.0350265	8		0.053625	0.00282527	8
24	0.753125	0.0253515	8		0.7155	0.0672607	8		0.663125	0.0304088	8		0.55775	0.041472	8		0.051625	0.00255999	8
	Strawberry
Time	Control				1.25% E-liquid (0.0625% Str)				2.5% E-liquid (0.125% Str)				5% E-liquid (0.25% Str)				5% E-liquid (0.25% Peroxide)
	Mean	SD	N		Mean	SD	N		Mean	SD	N		Mean	SD	N		Mean	SD	N
0	0.07575	0.00190863	8		0.075875	0.00124642	8		0.074375	0.000744023	8		0.07525	0.00198206	8		0.059625	0.00130247	8
2	0.085125	0.00229518	8		0.088	0.00141421	8		0.0845	0.00119523	8		0.0805	0.00177281	8		0.0555	0.00092582	8
4	0.162125	0.00496955	8		0.157625	0.0119873	8		0.133375	0.00776324	8		0.1085	0.00389138	8		0.054875	0.00279987	8
6	0.499625	0.0129718	8		0.458625	0.027129	8		0.34625	0.020831	8		0.192375	0.0085346	8		0.05425	0.00166905	8
8	0.590375	0.00803453	8		0.562	0.0197484	8		0.49	0.0106637	8		0.395375	0.0100986	8		0.05425	0.00212132	8
10	0.639	0.0150997	8		0.591875	0.0134848	8		0.5425	0.0149762	8		0.50425	0.0200766	8		0.053625	0.00282527	8
24	0.753125	0.0253515	8		0.695625	0.0451756	8		0.63325	0.0148492	8		0.566	0.0295538	8		0.051625	0.00255999	8
	Blueberry
Time	Control				1.25% E-liquid (0.0625% Blu)				2.5% E-liquid (0.125% Blu)				5% E-liquid (0.25% Blu)				5% E-liquid (0.25% Peroxide)
	Mean	SD	N		Mean	SD	N		Mean	SD	N		Mean	SD	N		Mean	SD	N
0	0.07575	0.00190863	8		0.07625	0.000886406	8		0.074625	0.000744023	8		0.074	0.00075593	8		0.059625	0.00130247	8
2	0.085125	0.00229518	8		0.0865	0.00151186	8		0.082625	0.000744022	8		0.07925	0.00148805	8		0.0555	0.00092582	8
4	0.162125	0.00496955	8		0.151	0.00868496	8		0.122875	0.00429077	8		0.104875	0.00274837	8		0.054875	0.00279987	8
6	0.499625	0.0129718	8		0.453875	0.0191045	8		0.31875	0.0271333	8		0.176625	0.00650137	8		0.05425	0.00166905	8
8	0.590375	0.00803453	8		0.551375	0.0122933	8		0.48475	0.00770436	8		0.38275	0.0107537	8		0.05425	0.00212132	8
10	0.639	0.0150997	8		0.59275	0.0063189	8		0.54675	0.0196814	8		0.494375	0.0224432	8		0.053625	0.00282527	8
24	0.753125	0.0253515	8		0.687375	0.0621311	8		0.643875	0.00888718	8		0.587	0.0210645	8		0.051625	0.00255999	8
S. mitis
	Flavorless E-liquid
Time	Control				1.25% E-liquid				2.5% E-liquid				5% E-liquid				5% E-liquid (0.25% Peroxide)
	Mean	SD	N		Mean	SD	N		Mean	SD	N		Mean	SD	N		Mean	SD	N
0	0.081375	0.00767068	8		0.0885	0.00979796	8		0.08	0.00671884	8		0.077125	0.00476408	8		0.06075	0.00433425	8
2	0.214125	0.0238653	8		0.2045	0.0204171	8		0.1745	0.0185703	8		0.123	0.00819407	8		0.057625	0.00272226	8
4	0.40675	0.00925435	8		0.389	0.0174356	8		0.364125	0.0118976	8		0.215875	0.0126541	8		0.05725	0.00433425	8
6	0.395125	0.00631184	8		0.392	0.01249	8		0.3895	0.0137217	8		0.3255	0.0263059	8		0.05625	0.00345378	8
8	0.3885	0.00826352	8		0.394875	0.0116917	8		0.384	0.021948	8		0.357625	0.0163963	8		0.056375	0.00518067	8
10	0.401	0.0121655	8		0.402125	0.0151605	8		0.39275	0.0189266	8		0.365625	0.0171376	8		0.05425	0.00212132	8
24	0.3815	0.00994269	8		0.367	0.0201069	8		0.35925	0.0157911	8		0.33025	0.013199	8		0.05275	0.00166905	8
	Tobacco
Time	Control				1.25% E-liquid (0.0625% Tob)				2.5% E-liquid (0.125% Tob)				5% E-liquid (0.25% Tob)				5% E-liquid (0.25% Peroxide)
	Mean	SD	N		Mean	SD	N		Mean	SD	N		Mean	SD	N		Mean	SD	N
0	0.081375	0.00767068	8		0.08225	0.00876275	8		0.080375	0.00843357	8		0.078625	0.00647936	8		0.06075	0.00433425	8
2	0.214125	0.0238653	8		0.212	0.0302844	8		0.198625	0.0212262	8		0.153	0.017088	8		0.057625	0.00272226	8
4	0.40675	0.00925435	8		0.386375	0.0186313	8		0.39725	0.0115109	8		0.2905	0.0378795	8		0.05725	0.00433425	8
6	0.395125	0.00631184	8		0.393	0.0199857	8		0.4065	0.0174765	8		0.371625	0.0132443	8		0.05625	0.00345378	8
8	0.3885	0.00826352	8		0.39875	0.0178945	8		0.406375	0.0129828	8		0.376	0.0123982	8		0.056375	0.00518067	8
10	0.401	0.0121655	8		0.406875	0.0116059	8		0.40975	0.0106469	8		0.383875	0.0122409	8		0.05425	0.00212132	8
24	0.3815	0.00994269	8		0.379875	0.0114572	8		0.373375	0.0101269	8		0.3475	0.00896023	8		0.05275	0.00166905	8
	Menthol
Time	Control				1.25% E-liquid (0.0625% Men)				2.5% E-liquid (0.125% Men)				5% E-liquid (0.25% Men)				5% E-liquid (0.25% Peroxide)
	Mean	SD	N		Mean	SD	N		Mean	SD	N		Mean	SD	N		Mean	SD	N
0	0.081375	0.00767068	8		0.16525	0.232429	8		0.079625	0.00713017	8		0.0785	0.00578174	8		0.06075	0.00433425	8
2	0.214125	0.0238653	8		0.206375	0.0238264	8		0.185375	0.0201773	8		0.142875	0.0119814	8		0.057625	0.00272226	8
4	0.40675	0.00925435	8		0.414625	0.0316225	8		0.392625	0.0285404	8		0.23	0.0213609	8		0.05725	0.00433425	8
6	0.395125	0.00631184	8		0.424625	0.0287051	8		0.431375	0.00853459	8		0.363875	0.0417696	8		0.05625	0.00345378	8
8	0.3885	0.00826352	8		0.402125	0.0245615	8		0.402875	0.0169405	8		0.3765	0.021314	8		0.056375	0.00518067	8
10	0.401	0.0121655	8		0.411625	0.0200281	8		0.409375	0.0061861	8		0.3885	0.016362	8		0.05425	0.00212132	8
24	0.3815	0.00994269	8		0.385875	0.0276686	8		0.385375	0.00430739	8		0.351625	0.0147352	8		0.05275	0.00166905	8
	Cinnamon
Time	Control				1.25% E-liquid (0.0625% Cin)				2.5% E-liquid (0.125% Cin)				5% E-liquid (0.25% Cin)				5% E-liquid (0.25% Peroxide)
	Mean	SD	N		Mean	SD	N		Mean	SD	N		Mean	SD	N		Mean	SD	N
0	0.081375	0.00767068	8		0.08275	0.00963253	8		0.080875	0.00845894	8		0.079375	0.00606954	8		0.06075	0.00433425	8
2	0.214125	0.0238653	8		0.200875	0.0241628	8		0.175375	0.0204166	8		0.129375	0.0102809	8		0.057625	0.00272226	8
4	0.40675	0.00925435	8		0.404	0.0228661	8		0.37325	0.0502387	8		0.2165	0.0210442	8		0.05725	0.00433425	8
6	0.395125	0.00631184	8		0.4195	0.0252982	8		0.43725	0.00506388	8		0.346375	0.0428017	8		0.05625	0.00345378	8
8	0.3885	0.00826352	8		0.410625	0.0236217	8		0.42225	0.0267568	8		0.375125	0.0170163	8		0.056375	0.00518067	8
10	0.401	0.0121655	8		0.40925	0.0164816	8		0.418625	0.0144414	8		0.388125	0.0122525	8		0.05425	0.00212132	8
24	0.3815	0.00994269	8		0.38675	0.0244058	8		0.39775	0.00671353	8		0.353625	0.0100561	8		0.05275	0.00166905	8
	Strawberry
Time	Control				1.25% E-liquid (0.0625% Str)				2.5% E-liquid (0.125% Str)				5% E-liquid (0.25% Str)				5% E-liquid (0.25% Peroxide)
	Mean	SD	N		Mean	SD	N		Mean	SD	N		Mean	SD	N		Mean	SD	N
0	0.081375	0.00767068	8		0.083	0.0108364	8		0.080625	0.00870037	8		0.07875	0.00599404	8		0.06075	0.00433425	8
2	0.214125	0.0238653	8		0.214375	0.0238084	8		0.189375	0.0177759	8		0.148625	0.0114635	8		0.057625	0.00272226	8
4	0.40675	0.00925435	8		0.421125	0.036172	8		0.398125	0.00912512	8		0.2635	0.0211997	8		0.05725	0.00433425	8
6	0.395125	0.00631184	8		0.42425	0.0327229	8		0.42425	0.0118894	8		0.383625	0.0251449	8		0.05625	0.00345378	8
8	0.3885	0.00826352	8		0.40875	0.0228207	8		0.39525	0.0142302	8		0.380625	0.0160974	8		0.056375	0.00518067	8
10	0.401	0.0121655	8		0.417375	0.0288342	8		0.407	0.00663325	8		0.389375	0.0144117	8		0.05425	0.00212132	8
24	0.3815	0.00994269	8		0.380125	0.0254919	8		0.376125	0.00375832	8		0.348125	0.0110639	8		0.05275	0.00166905	8
	Blueberry
Time	Control				1.25% E-liquid (0.0625% Blu)				2.5% E-liquid (0.125% Blu)				5% E-liquid (0.25% Blu)				5% E-liquid (0.25% Peroxide)
	Mean	SD	N		Mean	SD	N		Mean	SD	N		Mean	SD	N		Mean	SD	N
0	0.081375	0.00767068	8		0.082625	0.00692691	8		0.08	0.00563154	8		0.078	0.00489898	8		0.06075	0.00433425	8
2	0.214125	0.0238653	8		0.207625	0.0215071	8		0.184625	0.0203676	8		0.136	0.0109544	8		0.057625	0.00272226	8
4	0.40675	0.00925435	8		0.406625	0.0230957	8		0.3905	0.0122358	8		0.256625	0.0218432	8		0.05725	0.00433425	8
6	0.395125	0.00631184	8		0.417125	0.0206428	8		0.422625	0.0123397	8		0.38625	0.0241114	8		0.05625	0.00345378	8
8	0.3885	0.00826352	8		0.3925	0.012352	8		0.386	0.0218959	8		0.384875	0.0127216	8		0.056375	0.00518067	8
10	0.401	0.0121655	8		0.4055	0.0143228	8		0.4075	0.0109675	8		0.39475	0.0128813	8		0.05425	0.00212132	8
24	0.3815	0.00994269	8		0.37875	0.0186911	8		0.378	0.00792824	8		0.351625	0.00805229	8		0.05275	0.00166905	8
S. oralis
	Flavorless E-liquid
Time	Control				1.25% E-liquid				2.5% E-liquid				5% E-liquid				5% E-liquid (0.25% Peroxide)
	Mean	SD	N		Mean	SD	N		Mean	SD	N		Mean	SD	N		Mean	SD	N
0	0.074625	0.00130247	8		0.076125	0.00210017	8		0.074625	0.000916126	8		0.07425	0.00138873	8		0.059875	0.000991032	8
2	0.0815	0.00256348	8		0.080875	0.00241646	8		0.077125	0.00195941	8		0.07425	0.00138873	8		0.05625	0.00148805	8
4	0.130875	0.00543632	8		0.124625	0.00899107	8		0.10825	0.0073046	8		0.0885	0.00141422	8		0.054125	0.0013562	8
6	0.281375	0.0220644	8		0.27	0.0203961	8		0.211625	0.0126597	8		0.1225	0.0035051	8		0.054625	0.00140789	8
8	0.443625	0.00785471	8		0.428125	0.0203991	8		0.382625	0.018189	8		0.1695	0.012683	8		0.055875	0.00554044	8
10	0.450125	0.00442194	8		0.43625	0.00597017	8		0.398625	0.0133196	8		0.27475	0.0336823	8		0.053375	0.00118774	8
24	0.419875	0.0266857	8		0.407125	0.0281549	8		0.381125	0.0183726	8		0.319125	0.0164962	8		0.051875	0.00155265	8
	Tobacco
Time	Control				1.25% E-liquid (0.0625% Tob)				2.5% E-liquid (0.125% Tob)				5% E-liquid (0.25% Tob)				5% E-liquid (0.25% Peroxide)
	Mean	SD	N		Mean	SD	N		Mean	SD	N		Mean	SD	N		Mean	SD	N
0	0.074625	0.00130247	8		0.076625	0.00176777	8		0.075875	0.0013562	8		0.073	0.00075593	8		0.059875	0.000991032	8
2	0.0815	0.00256348	8		0.082125	0.00264237	8		0.079625	0.00238672	8		0.075125	0.0013562	8		0.05625	0.00148805	8
4	0.130875	0.00543632	8		0.128125	0.00899901	8		0.119125	0.00699872	8		0.092125	0.00285044	8		0.054125	0.0013562	8
6	0.281375	0.0220644	8		0.269	0.0310851	8		0.23075	0.0239866	8		0.129125	0.00775403	8		0.054625	0.00140789	8
8	0.443625	0.00785471	8		0.42825	0.0137191	8		0.3895	0.0191684	8		0.19625	0.0283083	8		0.055875	0.00554044	8
10	0.450125	0.00442194	8		0.43	0.0106637	8		0.397375	0.0146379	8		0.303625	0.0219866	8		0.053375	0.00118774	8
24	0.419875	0.0266857	8		0.401875	0.0152825	8		0.36775	0.0180297	8		0.3	0.0104472	8		0.051875	0.00155265	8
	Menthol
Time	Control				1.25% E-liquid (0.0625% Men)				2.5% E-liquid (0.125% Men)				5% E-liquid (0.25% Men)				5% E-liquid (0.25% Peroxide)
	Mean	SD	N		Mean	SD	N		Mean	SD	N		Mean	SD	N		Mean	SD	N
0	0.074625	0.00130247	8		0.075375	0.000916124	8		0.0745	0.000534524	8		0.07275	0.000462911	8		0.059875	0.000991032	8
2	0.0815	0.00256348	8		0.0815	0.00272554	8		0.078375	0.00176777	8		0.076	0.00192725	8		0.05625	0.00148805	8
4	0.130875	0.00543632	8		0.1325	0.00897616	8		0.11675	0.00675595	8		0.094	0.00469042	8		0.054125	0.0013562	8
6	0.281375	0.0220644	8		0.282125	0.0250168	8		0.22425	0.0154064	8		0.13075	0.00963253	8		0.054625	0.00140789	8
8	0.443625	0.00785471	8		0.445375	0.019559	8		0.400125	0.0113192	8		0.188375	0.0273388	8		0.055875	0.00554044	8
10	0.450125	0.00442194	8		0.43875	0.0128813	8		0.402875	0.00804341	8		0.31175	0.0359514	8		0.053375	0.00118774	8
24	0.419875	0.0266857	8		0.426125	0.0342697	8		0.42125	0.0206726	8		0.342	0.0224881	8		0.051875	0.00155265	8
	Cinnamon
Time	Control				1.25% E-liquid (0.0625% Cin)				2.5% E-liquid (0.125% Cin)				5% E-liquid (0.25% Cin)				5% E-liquid (0.25% Peroxide)
	Mean	SD	N		Mean	SD	N		Mean	SD	N		Mean	SD	N		Mean	SD	N
0	0.074625	0.00130247	8		0.076375	0.000916126	8		0.075125	0.00145774	8		0.075	0.00141421	8		0.059875	0.000991032	8
2	0.0815	0.00256348	8		0.080875	0.00258774	8		0.078625	0.00287539	8		0.076375	0.00213391	8		0.05625	0.00148805	8
4	0.130875	0.00543632	8		0.126375	0.00878208	8		0.11425	0.00919239	8		0.086375	0.00213391	8		0.054125	0.0013562	8
6	0.281375	0.0220644	8		0.260625	0.0223283	8		0.20825	0.032884	8		0.119	0.00489898	8		0.054625	0.00140789	8
8	0.443625	0.00785471	8		0.434625	0.0157293	8		0.39375	0.0197104	8		0.148125	0.0118012	8		0.055875	0.00554044	8
10	0.450125	0.00442194	8		0.43225	0.0104574	8		0.413125	0.0249996	8		0.208125	0.0329911	8		0.053375	0.00118774	8
24	0.419875	0.0266857	8		0.425875	0.0318453	8		0.42425	0.0155081	8		0.3435	0.0417954	8		0.051875	0.00155265	8
	Strawberry
Time	Control				1.25% E-liquid (0.0625% Str)				2.5% E-liquid (0.125% Str)				5% E-liquid (0.25% Str)				5% E-liquid (0.25% Peroxide)
	Mean	SD	N		Mean	SD	N		Mean	SD	N		Mean	SD	N		Mean	SD	N
0	0.074625	0.00130247	8		0.07525	0.00138873	8		0.074875	0.0013562	8		0.07375	0.000886407	8		0.059875	0.000991032	8
2	0.0815	0.00256348	8		0.0825	0.00410574	8		0.07875	0.00243487	8		0.07575	0.00138873	8		0.05625	0.00148805	8
4	0.130875	0.00543632	8		0.134	0.0114891	8		0.1165	0.00325137	8		0.0935	0.00320713	8		0.054125	0.0013562	8
6	0.281375	0.0220644	8		0.286875	0.0341987	8		0.22475	0.014028	8		0.130125	0.00917197	8		0.054625	0.00140789	8
8	0.443625	0.00785471	8		0.44075	0.0154434	8		0.392375	0.00866747	8		0.19525	0.0284743	8		0.055875	0.00554044	8
10	0.450125	0.00442194	8		0.4305	0.01081	8		0.397875	0.00610474	8		0.318	0.0277128	8		0.053375	0.00118774	8
24	0.419875	0.0266857	8		0.41275	0.0316758	8		0.4005	0.0171381	8		0.33625	0.0201264	8		0.051875	0.00155265	8
	Blueberry
Time	Control				1.25% E-liquid (0.0625% Blu)				2.5% E-liquid (0.125% Blu)				5% E-liquid (0.25% Blu)				5% E-liquid (0.25% Peroxide)
	Mean	SD	N		Mean	SD	N		Mean	SD	N		Mean	SD	N		Mean	SD	N
0	0.074625	0.00130247	8		0.07525	0.000707105	8		0.0745	0.00177281	8		0.0745	0.00092582	8		0.059875	0.000991032	8
2	0.0815	0.00256348	8		0.081	0.00207019	8		0.079125	0.00172689	8		0.07525	0.000462907	8		0.05625	0.00148805	8
4	0.130875	0.00543632	8		0.1285	0.00750238	8		0.115125	0.00569304	8		0.0945	0.00325137	8		0.054125	0.0013562	8
6	0.281375	0.0220644	8		0.280875	0.0240502	8		0.22425	0.0162722	8		0.13275	0.0108726	8		0.054625	0.00140789	8
8	0.443625	0.00785471	8		0.4395	0.0171131	8		0.39375	0.00722594	8		0.203375	0.0312818	8		0.055875	0.00554044	8
10	0.450125	0.00442194	8		0.435375	0.0105009	8		0.400375	0.00957583	8		0.32925	0.0287986	8		0.053375	0.00118774	8
24	0.419875	0.0266857	8		0.422625	0.031227	8		0.41275	0.0219203	8		0.33925	0.0244467	8		0.051875	0.00155265	8

## Sheet: Figure 7
Figure7, High Dose Reponse Growth Curves
S. gordonii
	Flavorless E-liquid
Time	Control				1.25% E-liquid				2.5% E-liquid				5% E-liquid				5% E-liquid (0.25% Peroxide)
	Mean	SD	N		Mean	SD	N		Mean	SD	N		Mean	SD	N		Mean	SD	N
0	0.06375	0.00125831	4		0.07075	0.000500001	4		0.06925	0.000957426	4		0.069	0	4		0.0555	0.00129099	4
2	0.07475	0.00298608	4		0.0785	0.00129099	4		0.07525	0.000957425	4		0.07425	0.000500001	4		0.0525	0.001291	4
4	0.11625	0.0139374	4		0.1085	0.00818536	4		0.0955	0.001291	4		0.0895	0.00331663	4		0.05175	0.000500001	4
6	0.3355	0.0512413	4		0.27125	0.0331197	4		0.21425	0.00419325	4		0.1645	0.0139164	4		0.051	0.000816497	4
8	0.6115	0.030249	4		0.58225	0.00793199	4		0.594	0.00734848	4		0.4625	0.0266396	4		0.05075	0.000499999	4
10	0.664	0.0121381	4		0.63775	0.0171537	4		0.62875	0.00236293	4		0.574	0.0142127	4		0.05025	0.000957427	4
12	0.67775	0.0123659	4		0.67425	0.0194143	4		0.67575	0.00149998	4		0.593	0.0148773	4		0.0495	0.001	4
24	0.6515	0.015843	4		0.63475	0.00991211	4		0.62275	0.00189297	4		0.5525	0.0142478	4		0.04825	0.000957427	4
	Tobacco
Time	Control				1.25% E-liquid (0.3125% Tob)				2.5% E-liquid (0.625% Tob)				5% E-liquid (1.25% Tob)				5% E-liquid (0.25% Peroxide)
	Mean	SD	N		Mean	SD	N		Mean	SD	N		Mean	SD	N		Mean	SD	N
0	0.06375	0.00125831	4		0.0725	0.00104083	4		0.0705	0.000288676	4		0.0705	0.00119024	4		0.0555	0.00129099	4
2	0.07475	0.00298608	4		0.07875	0.00149304	4		0.0755	0.000645497	4		0.0745	0.000645497	4		0.0525	0.001291	4
4	0.11625	0.0139374	4		0.11125	0.00528165	4		0.095	0.000816497	4		0.08425	0.00110868	4		0.05175	0.000500001	4
6	0.3355	0.0512413	4		0.29125	0.0194995	4		0.21075	0.00363719	4		0.13325	0.00490535	4		0.051	0.000816497	4
8	0.6115	0.030249	4		0.57225	0.0118559	4		0.57425	0.00188746	4		0.32125	0.0170654	4		0.05075	0.000499999	4
10	0.664	0.0121381	4		0.633	0.00897218	4		0.601	0.00426224	4		0.55325	0.00794118	4		0.05025	0.000957427	4
12	0.67775	0.0123659	4		0.67125	0.00848896	4		0.648	0.00536966	4		0.5945	0.00512348	4		0.0495	0.001	4
24	0.6515	0.015843	4		0.62775	0.0108886	4		0.60275	0.00505594	4		0.55425	0.00819934	4		0.04825	0.000957427	4
	Menthol
Time	Control				1.25% E-liquid 0.3125% Men)				2.5% E-liquid (0.625% Men)				5% E-liquid (1.25% Men)				5% E-liquid (0.25% Peroxide)
	Mean	SD	N		Mean	SD	N		Mean	SD	N		Mean	SD	N		Mean	SD	N
0	0.06375	0.00125831	4		0.07225	0.000500001	4		0.07375	0.000500001	4		0.10025	0.0551566	4		0.0555	0.00129099	4
2	0.07475	0.00298608	4		0.0775	0.001291	4		0.07675	0.000957429	4		0.071	0.00489898	4		0.0525	0.001291	4
4	0.11625	0.0139374	4		0.0995	0.00655744	4		0.085	0.0011547	4		0.07	0.00216025	4		0.05175	0.000500001	4
6	0.3355	0.0512413	4		0.23025	0.0262726	4		0.13775	0.00492443	4		0.07225	0.00394757	4		0.051	0.000816497	4
8	0.6115	0.030249	4		0.6065	0.00925564	4		0.4105	0.023388	4		0.08925	0.0224109	4		0.05075	0.000499999	4
10	0.664	0.0121381	4		0.641	0.00820569	4		0.664	0.00707108	4		0.142	0.0734983	4		0.05025	0.000957427	4
12	0.67775	0.0123659	4		0.68175	0.015756	4		0.68425	0.00830159	4		0.27875	0.170619	4		0.0495	0.001	4
24	0.6515	0.015843	4		0.6365	0.00574455	4		0.62925	0.0104682	4		0.5535	0.0546779	4		0.04825	0.000957427	4
	Cinnamon
Time	Control				1.25% E-liquid (0.3125% Cin)				2.5% E-liquid (0.625% Cin)				5% E-liquid (1.25% Cin)				5% E-liquid (0.25% Peroxide)
	Mean	SD	N		Mean	SD	N		Mean	SD	N		Mean	SD	N		Mean	SD	N
0	0.06375	0.00125831	4		0.13425	0.00411299	4		0.1965	0.0107238	4		0.555	0.259516	4		0.0555	0.00129099	4
2	0.07475	0.00298608	4		0.11475	0.00419325	4		0.16875	0.00974252	4		0.36825	0.0157982	4		0.0525	0.001291	4
4	0.11625	0.0139374	4		0.1165	0.00412311	4		0.1695	0.0101489	4		0.35525	0.0131244	4		0.05175	0.000500001	4
6	0.3355	0.0512413	4		0.12025	0.00287228	4		0.16525	0.00684957	4		0.34725	0.0153487	4		0.051	0.000816497	4
8	0.6115	0.030249	4		0.1245	0.00331663	4		0.16825	0.00492442	4		0.3475	0.0126623	4		0.05075	0.000499999	4
10	0.664	0.0121381	4		0.12675	0.00340343	4		0.16275	0.00434933	4		0.335	0.0119443	4		0.05025	0.000957427	4
12	0.67775	0.0123659	4		0.12825	0.00309569	4		0.16425	0.0055	4		0.3325	0.00858292	4		0.0495	0.001	4
24	0.6515	0.015843	4		0.12725	0.00170782	4		0.17175	0.00457347	4		0.33575	0.0122848	4		0.04825	0.000957427	4
	Strawberry
Time	Control				1.25% E-liquid (0.3125% Str)				2.5% E-liquid (0.625% Str)				5% E-liquid (1.25% Str)				5% E-liquid (0.25% Peroxide)
	Mean	SD	N		Mean	SD	N		Mean	SD	N		Mean	SD	N		Mean	SD	N
0	0.06375	0.00125831	4		0.07325	0.000500001	4		0.0725	0.000577351	4		0.07025	0.000500001	4		0.0555	0.00129099	4
2	0.07475	0.00298608	4		0.0755	0.000577347	4		0.07425	0.000500001	4		0.073	0.002	4		0.0525	0.001291	4
4	0.11625	0.0139374	4		0.0805	0.00264575	4		0.07375	0.000500001	4		0.0735	0.00238048	4		0.05175	0.000500001	4
6	0.3355	0.0512413	4		0.10725	0.0120381	4		0.07325	0.000500001	4		0.0725	0.00173205	4		0.051	0.000816497	4
8	0.6115	0.030249	4		0.19075	0.025773	4		0.07325	0.000957429	4		0.07275	0.0015	4		0.05075	0.000499999	4
10	0.664	0.0121381	4		0.36425	0.0435689	4		0.07425	0.0025	4		0.07175	0.00236291	4		0.05025	0.000957427	4
12	0.67775	0.0123659	4		0.5955	0.0222336	4		0.073	0.00270801	4		0.0725	0.00288675	4		0.0495	0.001	4
24	0.6515	0.015843	4		0.60475	0.0088459	4		0.0725	0.00238047	4		0.0705	0.00341565	4		0.04825	0.000957427	4
	Blueberry
Time	Control				1.25% E-liquid (0.3125% Blu)				2.5% E-liquid (0.625% Blu)				5% E-liquid (1.25% Blu)				5% E-liquid (0.25% Peroxide)
	Mean	SD	N		Mean	SD	N		Mean	SD	N		Mean	SD	N		Mean	SD	N
0	0.06375	0.00125831	4		0.07225	0.000500001	4		0.073	0.000816498	4		0.07075	0.000500001	4		0.0555	0.00129099	4
2	0.07475	0.00298608	4		0.079	0.0011547	4		0.077	0.000816498	4		0.0785	0.0043589	4		0.0525	0.001291	4
4	0.11625	0.0139374	4		0.10525	0.00767572	4		0.0915	0.00129099	4		0.0865	0.00238048	4		0.05175	0.000500001	4
6	0.3355	0.0512413	4		0.2505	0.0296479	4		0.18375	0.00585235	4		0.1305	0.00896289	4		0.051	0.000816497	4
8	0.6115	0.030249	4		0.59825	0.0119548	4		0.58	0.0100995	4		0.30875	0.0240468	4		0.05075	0.000499999	4
10	0.664	0.0121381	4		0.64275	0.0153052	4		0.63225	0.00749999	4		0.56775	0.0190153	4		0.05025	0.000957427	4
12	0.67775	0.0123659	4		0.68425	0.0205325	4		0.6695	0.00869865	4		0.59	0.0158114	4		0.0495	0.001	4
24	0.6515	0.015843	4		0.63875	0.00991213	4		0.62475	0.00865544	4		0.54475	0.00917878	4		0.04825	0.000957427	4
S. intermedius
	Flavorless E-liquid
Time	Control				1.25% E-liquid				2.5% E-liquid				5% E-liquid				5% E-liquid (0.25% Peroxide)
	Mean	SD	N		Mean	SD	N		Mean	SD	N		Mean	SD	N		Mean	SD	N
0	0.06725	0.00189297	4		0.074	0.00141421	4		0.07425	0.00457347	4		0.0695	0.001	4		0.05875	0.0015	4
2	0.06925	0.0015	4		0.0765	0.00310913	4		0.07825	0.00708872	4		0.0715	0.00129099	4		0.05425	0.000957427	4
4	0.078	0.0034641	4		0.08375	0.00309569	4		0.08175	0.0045	4		0.0745	0.00129099	4		0.05375	0.0015	4
6	0.10275	0.00830161	4		0.103	0.00391578	4		0.1005	0.00387298	4		0.0855	0.00129099	4		0.053	0.00182574	4
8	0.1875	0.0334913	4		0.15475	0.020662	4		0.13075	0.00394758	4		0.099	0.0023094	4		0.05275	0.0015	4
10	0.3875	0.0534509	4		0.314	0.0537835	4		0.23325	0.00665207	4		0.12675	0.00680074	4		0.05325	0.00275378	4
12	0.49625	0.0370169	4		0.44275	0.0482312	4		0.4155	0.00834665	4		0.22625	0.0195683	4		0.05225	0.00262995	4
24	0.67425	0.050348	4		0.6015	0.0635216	4		0.55625	0.00873213	4		0.4935	0.0166233	4		0.051	0.0023094	4
	Tobacco
Time	Control				1.25% E-liquid (0.3125% Tob)				2.5% E-liquid (0.625% Tob)				5% E-liquid (1.25% Tob)				5% E-liquid (0.25% Peroxide)
	Mean	SD	N		Mean	SD	N		Mean	SD	N		Mean	SD	N		Mean	SD	N
0	0.06725	0.00189297	4		0.076	0.00141421	4		0.07425	0.0012583	4		0.07225	0.000957426	4		0.05875	0.0015	4
2	0.06925	0.0015	4		0.078	0.00141421	4		0.0765	0.00129099	4		0.07525	0.00298608	4		0.05425	0.000957427	4
4	0.078	0.0034641	4		0.08525	0.0025	4		0.0815	0.00129099	4		0.07675	0.0025	4		0.05375	0.0015	4
6	0.10275	0.00830161	4		0.105	0.00282843	4		0.10025	0.00221735	4		0.08225	0.00368556	4		0.053	0.00182574	4
8	0.1875	0.0334913	4		0.14675	0.00953502	4		0.12075	0.00298608	4		0.09575	0.00298608	4		0.05275	0.0015	4
10	0.3875	0.0534509	4		0.296	0.0235089	4		0.191	0.00637704	4		0.11425	0.00340343	4		0.05325	0.00275378	4
12	0.49625	0.0370169	4		0.46625	0.0139373	4		0.40325	0.00780491	4		0.173	0.0120278	4		0.05225	0.00262995	4
24	0.67425	0.050348	4		0.57025	0.0402855	4		0.582	0.0122474	4		0.48625	0.0118146	4		0.051	0.0023094	4
	Menthol
Time	Control				1.25% E-liquid 0.3125% Men)				2.5% E-liquid (0.625% Men)				5% E-liquid (1.25% Men)				5% E-liquid (0.25% Peroxide)
	Mean	SD	N		Mean	SD	N		Mean	SD	N		Mean	SD	N		Mean	SD	N
0	0.06725	0.00189297	4		0.078	0.00244949	4		0.07275	0.000500001	4		0.07725	0.00170783	4		0.05875	0.0015	4
2	0.06925	0.0015	4		0.0795	0.00331663	4		0.07725	0.00275378	4		0.071	0.00141421	4		0.05425	0.000957427	4
4	0.078	0.0034641	4		0.08575	0.00713559	4		0.07925	0.00275379	4		0.0695	0.00173205	4		0.05375	0.0015	4
6	0.10275	0.00830161	4		0.104	0.00752773	4		0.08825	0.0045	4		0.0685	0.00173205	4		0.053	0.00182574	4
8	0.1875	0.0334913	4		0.1435	0.0121244	4		0.1075	0.007	4		0.0695	0.00129099	4		0.05275	0.0015	4
10	0.3875	0.0534509	4		0.28875	0.0342965	4		0.1635	0.0147986	4		0.07	0.00163299	4		0.05325	0.00275378	4
12	0.49625	0.0370169	4		0.50475	0.00822091	4		0.37775	0.0353117	4		0.0745	0.00479583	4		0.05225	0.00262995	4
24	0.67425	0.050348	4		0.57075	0.0314894	4		0.58175	0.012339	4		0.36425	0.138575	4		0.051	0.0023094	4
	Cinnamon
Time	Control				1.25% E-liquid (0.3125% Cin)				2.5% E-liquid (0.625% Cin)				5% E-liquid (1.25% Cin)				5% E-liquid (0.25% Peroxide)
	Mean	SD	N		Mean	SD	N		Mean	SD	N		Mean	SD	N		Mean	SD	N
0	0.06725	0.00189297	4		0.1315	0.00369685	4		0.30775	0.0286633	4		0.668	0.258379	4		0.05875	0.0015	4
2	0.06925	0.0015	4		0.11425	0.0015	4		0.2535	0.0326854	4		0.456	0.0291319	4		0.05425	0.000957427	4
4	0.078	0.0034641	4		0.115	0.00182574	4		0.23775	0.0222916	4		0.464	0.0342442	4		0.05375	0.0015	4
6	0.10275	0.00830161	4		0.115	0.00244949	4		0.23225	0.0196363	4		0.4445	0.0391621	4		0.053	0.00182574	4
8	0.1875	0.0334913	4		0.1145	0.00129099	4		0.229	0.0191659	4		0.44275	0.0426018	4		0.05275	0.0015	4
10	0.3875	0.0534509	4		0.115	0.00258199	4		0.2285	0.0186994	4		0.444	0.0392003	4		0.05325	0.00275378	4
12	0.49625	0.0370169	4		0.116	0.00294392	4		0.23075	0.0182277	4		0.44375	0.040885	4		0.05225	0.00262995	4
24	0.67425	0.050348	4		0.11325	0.00221735	4		0.2225	0.0161348	4		0.45025	0.0477101	4		0.051	0.0023094	4
	Strawberry
Time	Control				1.25% E-liquid (0.3125% Str)				2.5% E-liquid (0.625% Str)				5% E-liquid (1.25% Str)				5% E-liquid (0.25% Peroxide)
	Mean	SD	N		Mean	SD	N		Mean	SD	N		Mean	SD	N		Mean	SD	N
0	0.06725	0.00189297	4		0.076	0	4		0.07325	0.000957429	4		0.07175	0.0015	4		0.05875	0.0015	4
2	0.06925	0.0015	4		0.07625	0.00189297	4		0.07425	0.000957429	4		0.0745	0.00129099	4		0.05425	0.000957427	4
4	0.078	0.0034641	4		0.07625	0.00189297	4		0.07425	0.000957429	4		0.074	0.00182574	4		0.05375	0.0015	4
6	0.10275	0.00830161	4		0.075	0.002	4		0.07325	0.000957429	4		0.07325	0.0015	4		0.053	0.00182574	4
8	0.1875	0.0334913	4		0.07475	0.00221736	4		0.07325	0.000957429	4		0.073	0.00182574	4		0.05275	0.0015	4
10	0.3875	0.0534509	4		0.07375	0.00221736	4		0.073	0.0011547	4		0.07225	0.00221736	4		0.05325	0.00275378	4
12	0.49625	0.0370169	4		0.074	0.00216025	4		0.07225	0.000957426	4		0.07175	0.00170783	4		0.05225	0.00262995	4
24	0.67425	0.050348	4		0.071	0.00141421	4		0.071	0	4		0.0715	0.00173205	4		0.051	0.0023094	4
	Blueberry
Time	Control				1.25% E-liquid (0.3125% Blu)				2.5% E-liquid (0.625% Blu)				5% E-liquid (1.25% Blu)				5% E-liquid (0.25% Peroxide)
	Mean	SD	N		Mean	SD	N		Mean	SD	N		Mean	SD	N		Mean	SD	N
0	0.06725	0.00189297	4		0.07525	0.000499997	4		0.0735	0.000577351	4		0.07275	0.000500001	4		0.05875	0.0015	4
2	0.06925	0.0015	4		0.0775	0.000577351	4		0.0755	0.000577347	4		0.075	0.000816495	4		0.05425	0.000957427	4
4	0.078	0.0034641	4		0.08375	0.000957429	4		0.0795	0.00129099	4		0.0775	0.000577351	4		0.05375	0.0015	4
6	0.10275	0.00830161	4		0.1085	0.00173205	4		0.09575	0.00236291	4		0.08275	0.0015	4		0.053	0.00182574	4
8	0.1875	0.0334913	4		0.17125	0.00478714	4		0.12625	0.00499166	4		0.096	0.00316228	4		0.05275	0.0015	4
10	0.3875	0.0534509	4		0.37925	0.00613052	4		0.221	0.0144914	4		0.12175	0.0056199	4		0.05325	0.00275378	4
12	0.49625	0.0370169	4		0.51025	0.0141274	4		0.44175	0.013301	4		0.1925	0.0174833	4		0.05225	0.00262995	4
24	0.67425	0.050348	4		0.62825	0.0478217	4		0.58	0.0113431	4		0.4895	0.0151547	4		0.051	0.0023094	4
S. mitis
	Flavorless E-liquid
Time	Control				1.25% E-liquid				2.5% E-liquid				5% E-liquid				5% E-liquid (0.25% Peroxide)
	Mean	SD	N		Mean	SD	N		Mean	SD	N		Mean	SD	N		Mean	SD	N
0	0.06775	0.00377492	4		0.07475	0.00170783	4		0.0725	0.000999998	4		0.07175	0.0015	4		0.0585	0.000577351	4
2	0.0875	0.00660808	4		0.087	0.00374166	4		0.08175	0.0015	4		0.082	0.00244949	4		0.05475	0.000957427	4
4	0.172	0.0146515	4		0.1505	0.0114455	4		0.12975	0.00330404	4		0.11225	0.00170783	4		0.05425	0.00189297	4
6	0.269	0.0156418	4		0.24725	0.00236291	4		0.221	0.0052915	4		0.1675	0.00479583	4		0.0535	0.00238048	4
8	0.33475	0.0082209	4		0.36375	0.0315951	4		0.36275	0.00861684	4		0.225	0.0241247	4		0.053	0.00216025	4
10	0.32725	0.00618466	4		0.3745	0.0350381	4		0.418	0.00934523	4		0.27875	0.0552351	4		0.05175	0.00170783	4
12	0.326	0.0146515	4		0.374	0.0294505	4		0.40575	0.00718214	4		0.3215	0.0771254	4		0.0515	0.00173205	4
24	0.357	0.0339018	4		0.362	0.00983193	4		0.37025	0.00741058	4		0.30575	0.0688446	4		0.04875	0.000957427	4
	Tobacco
Time	Control				1.25% E-liquid (0.3125% Tob)				2.5% E-liquid (0.625% Tob)				5% E-liquid (1.25% Tob)				5% E-liquid (0.25% Peroxide)
	Mean	SD	N		Mean	SD	N		Mean	SD	N		Mean	SD	N		Mean	SD	N
0	0.06775	0.00377492	4		0.074	0	4		0.0735	0.00173205	4		0.072	0.000816495	4		0.0585	0.000577351	4
2	0.0875	0.00660808	4		0.0875	0.00310913	4		0.083	0.00216025	4		0.07975	0.000957425	4		0.05475	0.000957427	4
4	0.172	0.0146515	4		0.155	0.00996661	4		0.135	0.00270801	4		0.1045	0.00251661	4		0.05425	0.00189297	4
6	0.269	0.0156418	4		0.2585	0.00967815	4		0.2185	0.00818536	4		0.153	0.00408249	4		0.0535	0.00238048	4
8	0.33475	0.0082209	4		0.36775	0.0132508	4		0.316	0.0228473	4		0.19025	0.0126853	4		0.053	0.00216025	4
10	0.32725	0.00618466	4		0.3445	0.0172916	4		0.35425	0.0246627	4		0.21025	0.0233435	4		0.05175	0.00170783	4
12	0.326	0.0146515	4		0.35725	0.018246	4		0.35875	0.0235142	4		0.23175	0.0319831	4		0.0515	0.00173205	4
24	0.357	0.0339018	4		0.3375	0.00918333	4		0.32675	0.0219146	4		0.25075	0.060489	4		0.04875	0.000957427	4
	Menthol
Time	Control				1.25% E-liquid 0.3125% Men)				2.5% E-liquid (0.625% Men)				5% E-liquid (1.25% Men)				5% E-liquid (0.25% Peroxide)
	Mean	SD	N		Mean	SD	N		Mean	SD	N		Mean	SD	N		Mean	SD	N
0	0.06775	0.00377492	4		0.077	0.00163299	4		0.076	0.002	4		0.101	0.0442794	4		0.0585	0.000577351	4
2	0.0875	0.00660808	4		0.08625	0.00377492	4		0.08	0.000816495	4		0.078	0.00270801	4		0.05475	0.000957427	4
4	0.172	0.0146515	4		0.13625	0.0137204	4		0.09975	0.00298608	4		0.0805	0.00404145	4		0.05425	0.00189297	4
6	0.269	0.0156418	4		0.224	0.0125698	4		0.17125	0.00684957	4		0.084	0.00316228	4		0.0535	0.00238048	4
8	0.33475	0.0082209	4		0.36775	0.0234716	4		0.266	0.0160416	4		0.09575	0.00830161	4		0.053	0.00216025	4
10	0.32725	0.00618466	4		0.421	0.0427629	4		0.3845	0.0320884	4		0.11925	0.0181177	4		0.05175	0.00170783	4
12	0.326	0.0146515	4		0.41475	0.0432232	4		0.46375	0.0178582	4		0.15725	0.013376	4		0.0515	0.00173205	4
24	0.357	0.0339018	4		0.3825	0.0347803	4		0.42175	0.00910585	4		0.3495	0.0814432	4		0.04875	0.000957427	4
	Cinnamon
Time	Control				1.25% E-liquid (0.3125% Cin)				2.5% E-liquid (0.625% Cin)				5% E-liquid (1.25% Cin)				5% E-liquid (0.25% Peroxide)
	Mean	SD	N		Mean	SD	N		Mean	SD	N		Mean	SD	N		Mean	SD	N
0	0.06775	0.00377492	4		0.12475	0.000957429	4		0.30475	0.0328367	4		0.4785	0.279908	4		0.0585	0.000577351	4
2	0.0875	0.00660808	4		0.12	0.00424264	4		0.23875	0.0235567	4		0.27875	0.055506	4		0.05475	0.000957427	4
4	0.172	0.0146515	4		0.124	0.00316228	4		0.2275	0.0180462	4		0.27475	0.0481759	4		0.05425	0.00189297	4
6	0.269	0.0156418	4		0.12925	0.00298608	4		0.2275	0.0165831	4		0.2695	0.0434856	4		0.0535	0.00238048	4
8	0.33475	0.0082209	4		0.13375	0.00125831	4		0.2255	0.0165831	4		0.27025	0.0418838	4		0.053	0.00216025	4
10	0.32725	0.00618466	4		0.134	0.00216024	4		0.213	0.0152534	4		0.2585	0.0470071	4		0.05175	0.00170783	4
12	0.326	0.0146515	4		0.13575	0.0012583	4		0.20725	0.0194487	4		0.265	0.051199	4		0.0515	0.00173205	4
24	0.357	0.0339018	4		0.146	0.00258199	4		0.21725	0.0166007	4		0.28325	0.0720064	4		0.04875	0.000957427	4
	Strawberry
Time	Control				1.25% E-liquid (0.3125% Str)				2.5% E-liquid (0.625% Str)				5% E-liquid (1.25% Str)				5% E-liquid (0.25% Peroxide)
	Mean	SD	N		Mean	SD	N		Mean	SD	N		Mean	SD	N		Mean	SD	N
0	0.06775	0.00377492	4		0.07575	0.000478713	4		0.07375	0.000478714	4		0.07325	0.000629154	4		0.0585	0.000577351	4
2	0.0875	0.00660808	4		0.0775	0.000288676	4		0.07525	0.000249999	4		0.07575	0.000478713	4		0.05475	0.000957427	4
4	0.172	0.0146515	4		0.07775	0.000478714	4		0.07425	0.000250001	4		0.07525	0.000629152	4		0.05425	0.00189297	4
6	0.269	0.0156418	4		0.0845	0.00165831	4		0.0745	0.000288676	4		0.07525	0.000629152	4		0.0535	0.00238048	4
8	0.33475	0.0082209	4		0.12325	0.00838028	4		0.07425	0.000250001	4		0.07525	0.000946485	4		0.053	0.00216025	4
10	0.32725	0.00618466	4		0.20625	0.0161316	4		0.0735	0.000288676	4		0.0735	0.00104083	4		0.05175	0.00170783	4
12	0.326	0.0146515	4		0.37475	0.0231458	4		0.07375	0.000250001	4		0.07375	0.000853913	4		0.0515	0.00173205	4
24	0.357	0.0339018	4		0.6505	0.012659	4		0.0715	0.000288674	4		0.0715	0.00119024	4		0.04875	0.000957427	4
	Blueberry
Time	Control				1.25% E-liquid (0.3125% Blu)				2.5% E-liquid (0.625% Blu)				5% E-liquid (1.25% Blu)				5% E-liquid (0.25% Peroxide)
	Mean	SD	N		Mean	SD	N		Mean	SD	N		Mean	SD	N		Mean	SD	N
0	0.06775	0.00377492	4		0.0775	0.00310913	4		0.075	0.0011547	4		0.0735	0.000577351	4		0.0585	0.000577351	4
2	0.0875	0.00660808	4		0.0885	0.00331662	4		0.083	0.000816495	4		0.08075	0.000957429	4		0.05475	0.000957427	4
4	0.172	0.0146515	4		0.15025	0.0108128	4		0.12675	0.00359398	4		0.101	0.00141421	4		0.05425	0.00189297	4
6	0.269	0.0156418	4		0.25875	0.00793201	4		0.2245	0.00967816	4		0.14675	0.00607591	4		0.0535	0.00238048	4
8	0.33475	0.0082209	4		0.41	0.0437036	4		0.41725	0.0188392	4		0.20325	0.0274758	4		0.053	0.00216025	4
10	0.32725	0.00618466	4		0.4045	0.0410731	4		0.44875	0.00221735	4		0.266	0.0677003	4		0.05175	0.00170783	4
12	0.326	0.0146515	4		0.41025	0.0410802	4		0.4465	0.00300001	4		0.33825	0.109613	4		0.0515	0.00173205	4
24	0.357	0.0339018	4		0.3895	0.0344335	4		0.4145	0.00645497	4		0.34175	0.103992	4		0.04875	0.000957427	4
S. oralis
	Flavorless E-liquid
Time	Control				1.25% E-liquid				2.5% E-liquid				5% E-liquid				5% E-liquid (0.25% Peroxide)
	Mean	SD	N		Mean	SD	N		Mean	SD	N		Mean	SD	N		Mean	SD	N
0	0.06475	0.000499997	4		0.07325	0.00189297	4		0.07075	0.000957426	4		0.0685	0.000577347	4		0.05775	0.0015	4
2	0.077	0.0011547	4		0.08375	0.00309569	4		0.07775	0.000957429	4		0.075	0.000816495	4		0.0535	0.00173205	4
4	0.1165	0.00568624	4		0.11375	0.00699405	4		0.099	0.00141421	4		0.09025	0.00221736	4		0.053	0.0023094	4
6	0.2255	0.0140594	4		0.21575	0.013326	4		0.1765	0.00191486	4		0.14175	0.00556028	4		0.0525	0.00238048	4
8	0.43375	0.0309771	4		0.4045	0.00732576	4		0.3285	0.00544671	4		0.22175	0.00543905	4		0.0525	0.00208166	4
10	0.45575	0.0504141	4		0.438	0.0131909	4		0.43925	0.00262995	4		0.3055	0.0132035	4		0.05225	0.00206155	4
12	0.45725	0.0177459	4		0.4575	0.0174069	4		0.47425	0.00298608	4		0.38375	0.0259663	4		0.05125	0.00262996	4
24	0.548	0.0280238	4		0.48075	0.0274515	4		0.454	0.000816498	4		0.3835	0.0204042	4		0.05	0.00216025	4
	Tobacco
Time	Control				1.25% E-liquid (0.3125% Tob)				2.5% E-liquid (0.625% Tob)				5% E-liquid (1.25% Tob)				5% E-liquid (0.25% Peroxide)
	Mean	SD	N		Mean	SD	N		Mean	SD	N		Mean	SD	N		Mean	SD	N
0	0.06475	0.000499997	4		0.07325	0.000500001	4		0.07225	0.00170783	4		0.071	0.002	4		0.05775	0.0015	4
2	0.077	0.0011547	4		0.08375	0.00170783	4		0.0805	0.00208166	4		0.07775	0.00221736	4		0.0535	0.00173205	4
4	0.1165	0.00568624	4		0.113	0.00743864	4		0.0985	0.00331663	4		0.08775	0.00170783	4		0.053	0.0023094	4
6	0.2255	0.0140594	4		0.20775	0.0084212	4		0.17775	0.00639661	4		0.12175	0.00206155	4		0.0525	0.00238048	4
8	0.43375	0.0309771	4		0.38925	0.00660177	4		0.32825	0.0233435	4		0.16925	0.00320156	4		0.0525	0.00208166	4
10	0.45575	0.0504141	4		0.46075	0.0110265	4		0.4775	0.0298943	4		0.215	0.0108628	4		0.05225	0.00206155	4
12	0.45725	0.0177459	4		0.47275	0.00861684	4		0.47275	0.0177083	4		0.269	0.0202814	4		0.05125	0.00262996	4
24	0.548	0.0280238	4		0.47875	0.0468926	4		0.4465	0.0134288	4		0.33475	0.0362158	4		0.05	0.00216025	4
	Menthol
Time	Control				1.25% E-liquid 0.3125% Men)				2.5% E-liquid (0.625% Men)				5% E-liquid (1.25% Men)				5% E-liquid (0.25% Peroxide)
	Mean	SD	N		Mean	SD	N		Mean	SD	N		Mean	SD	N		Mean	SD	N
0	0.06475	0.000499997	4		0.0745	0.00129099	4		0.074	0.00141421	4		0.09075	0.0355657	4		0.05775	0.0015	4
2	0.077	0.0011547	4		0.0825	0.00208167	4		0.07975	0.00170783	4		0.0735	0.00191486	4		0.0535	0.00173205	4
4	0.1165	0.00568624	4		0.10275	0.00512348	4		0.08675	0.00170783	4		0.07525	0.00206155	4		0.053	0.0023094	4
6	0.2255	0.0140594	4		0.169	0.0132161	4		0.1035	0.00479583	4		0.07675	0.00287228	4		0.0525	0.00238048	4
8	0.43375	0.0309771	4		0.2915	0.0230145	4		0.1625	0.0129228	4		0.07975	0.00359398	4		0.0525	0.00208166	4
10	0.45575	0.0504141	4		0.4405	0.012897	4		0.22775	0.0188746	4		0.08125	0.00340343	4		0.05225	0.00206155	4
12	0.45725	0.0177459	4		0.469	0.0134907	4		0.36125	0.0355844	4		0.08525	0.00411299	4		0.05125	0.00262996	4
24	0.548	0.0280238	4		0.45	0.0219545	4		0.42575	0.0328976	4		0.32925	0.0203204	4		0.05	0.00216025	4
	Cinnamon
Time	Control				1.25% E-liquid (0.3125% Cin)				2.5% E-liquid (0.625% Cin)				5% E-liquid (1.25% Cin)				5% E-liquid (0.25% Peroxide)
	Mean	SD	N		Mean	SD	N		Mean	SD	N		Mean	SD	N		Mean	SD	N
0	0.06475	0.000499997	4		0.121	0.00365148	4		0.1475	0.0152643	4		0.88925	0.238076	4		0.05775	0.0015	4
2	0.077	0.0011547	4		0.12225	0.00499166	4		0.14575	0.00861684	4		0.46975	0.0634685	4		0.0535	0.00173205	4
4	0.1165	0.00568624	4		0.11675	0.00377492	4		0.1395	0.006245	4		0.43775	0.0819568	4		0.053	0.0023094	4
6	0.2255	0.0140594	4		0.11375	0.00298608	4		0.13225	0.00485627	4		0.42975	0.0907207	4		0.0525	0.00238048	4
8	0.43375	0.0309771	4		0.1145	0.00251661	4		0.1345	0.00613732	4		0.4335	0.0907212	4		0.0525	0.00208166	4
10	0.45575	0.0504141	4		0.1155	0.00387298	4		0.13475	0.00419325	4		0.4285	0.0885607	4		0.05225	0.00206155	4
12	0.45725	0.0177459	4		0.12	0.00571548	4		0.13975	0.00287228	4		0.4275	0.0910696	4		0.05125	0.00262996	4
24	0.548	0.0280238	4		0.1235	0.00264575	4		0.13925	0.00485627	4		0.438	0.0945234	4		0.05	0.00216025	4
	Strawberry
Time	Control				1.25% E-liquid (0.3125% Str)				2.5% E-liquid (0.625% Str)				5% E-liquid (1.25% Str)				5% E-liquid (0.25% Peroxide)
	Mean	SD	N		Mean	SD	N		Mean	SD	N		Mean	SD	N		Mean	SD	N
0	0.06475	0.000499997	4		0.07425	0.000500001	4		0.071	0.000816495	4		0.07075	0.000957426	4		0.05775	0.0015	4
2	0.077	0.0011547	4		0.07525	0.000499997	4		0.072	0.000816495	4		0.07175	0.00189297	4		0.0535	0.00173205	4
4	0.1165	0.00568624	4		0.07525	0.000499997	4		0.07225	0.000500001	4		0.0725	0.00129099	4		0.053	0.0023094	4
6	0.2255	0.0140594	4		0.074	0.000816498	4		0.0715	0.000577347	4		0.0725	0.000999998	4		0.0525	0.00238048	4
8	0.43375	0.0309771	4		0.076	0.00244949	4		0.07175	0.000957425	4		0.074	0.00163299	4		0.0525	0.00208166	4
10	0.45575	0.0504141	4		0.0755	0.00208167	4		0.07125	0.000499997	4		0.073	0.00258199	4		0.05225	0.00206155	4
12	0.45725	0.0177459	4		0.076	0.00141421	4		0.071	0.000816495	4		0.07325	0.0025	4		0.05125	0.00262996	4
24	0.548	0.0280238	4		0.13125	0.0739341	4		0.0705	0.00173205	4		0.0715	0.00238048	4		0.05	0.00216025	4
	Blueberry
Time	Control				1.25% E-liquid (0.3125% Blu)				2.5% E-liquid (0.625% Blu)				5% E-liquid (1.25% Blu)				5% E-liquid (0.25% Peroxide)
	Mean	SD	N		Mean	SD	N		Mean	SD	N		Mean	SD	N		Mean	SD	N
0	0.06475	0.000499997	4		0.07225	0.000957426	4		0.072	0.00141421	4		0.07175	0.000499997	4		0.05775	0.0015	4
2	0.077	0.0011547	4		0.0815	0.00129099	4		0.0785	0.00129099	4		0.07725	0.000957429	4		0.0535	0.00173205	4
4	0.1165	0.00568624	4		0.10975	0.0056199	4		0.0925	0.00191485	4		0.08325	0.00170783	4		0.053	0.0023094	4
6	0.2255	0.0140594	4		0.206	0.00905538	4		0.15975	0.00275378	4		0.10375	0.00434933	4		0.0525	0.00238048	4
8	0.43375	0.0309771	4		0.3805	0.00732576	4		0.2575	0.0106615	4		0.13625	0.0065	4		0.0525	0.00208166	4
10	0.45575	0.0504141	4		0.41675	0.0249048	4		0.36725	0.0219602	4		0.156	0.00571547	4		0.05225	0.00206155	4
12	0.45725	0.0177459	4		0.4575	0.015695	4		0.4075	0.0228108	4		0.179	0.0108012	4		0.05125	0.00262996	4
24	0.548	0.0280238	4		0.46825	0.0255913	4		0.41125	0.0239774	4		0.2365	0.0425402	4		0.05	0.00216025	4

## Sheet: Figure 8
Figure 8, Effects of percent flavorless E-liquid in BHI on bacterial growth at the start of the plateau phase (shown as percent change from control)
		S. gordonii at 8 hrs				S. intermedius at 10 hrs				S. mitis at 8 hrs				S. oralis at 10 hrs
		Mean	SD	N		Mean	SD	N		Mean	SD	N		Mean	SD	N
1.25% E-liquid in BHI		98.25	4.39968	8		89.3333	9.47085	12		103.917	6.54298	12		96.8333	1.94625	12
2.5% E-liquid in BHI		99.875	3.39906	8		76.75	12.2928	12		102	6.56437	12		91.0833	4.54189	12
5% in E-liquid BHI		81.75	7.04577	8		61.4167	21.2066	12		83.75	13.1849	12		63.0833	6.82853	12

## Sheet: Figure 9
Figure 9, Effects of E-liquid ± high and low percent flavors in BHI on bacterial growth at the start of the plateau phase (shown as percent change from control)
	S. gordonii at 8 hrs
	Tobacco				Menthol				Cinnamon				Strawberry				Blueberry
	Mean	SD	N		Mean	SD	N		Mean	SD	N		Mean	SD	N		Mean	SD	N
5% Flavorless E-liquid in BHI (control)	81.75	7.04577	8		81.75	7.04577	8		81.75	7.04577	8		81.75	7.04577	8		81.75	7.04577	8
1.25 % E-liquid and 0.0625% flavor in BHI	98.5598	4.24587	4		98.7445	4.36934	4		97.4151	2.17257	4		99.8154	2.7193	4		100.222	3.9644	4
2.5% E-liquid and 0.125% flavor in BHI	97.4151	1.80706	4		102.4	1.91217	4		102.179	1.96099	4		99.7784	1.93908	4		103.619	1.57481	4
5% E-liquid and 0.25% flavor in BHI	89.6233	0.872826	4		89.6233	0.872826	4		93.6854	2.9105	4		90.2511	1.91834	4		93.2792	4.21342	4
1.25% E-liquid and 0.3125% flavor in BHI	93.5	3.87298	4		99	1.41421	4		0	0	4		31.1683	4.21128	4		97.75	1.70782	4
2.5% E-liquid and 0.625% flavor in BHI	93.75	0.5	4		67.25	3.68556	4		0	0	4		11.9689	0.156442	4		94.75	1.5	4
5% E-liquid and 1.25% flavor in BHI	52.75	5.73731	4		14.5	3.87298	4		0	0	4		11.8872	0.245098	4		50.25	3.94757	4
	S. intermedius at 10 hrs
	Tobacco				Menthol				Cinnamon				Strawberry				Blueberry
	Mean	SD	N		Mean	SD	N		Mean	SD	N		Mean	SD	N		Mean	SD	N
5% Flavorless E-liquid in BHI (control)	61.4167	21.2066	12		61.4167	21.2066	12		61.4167	21.2066	12		61.4167	21.2066	12		61.4167	21.2066	12
1.25 % E-liquid and 0.0625% flavor in BHI	93.375	1.99553	8		93.5	3.02372	8		93.875	2.03101	8		92.875	2.03101	8		92.625	1.06066	8
2.5% E-liquid and 0.125% flavor in BHI	86.75	2.25198	8		86.5	3.62531	8		89.125	2.58775	8		85.125	2.29518	8		85.5	3.0706	8
5% E-liquid and 0.25% flavor in BHI	79.25	1.38873	8		77	4.0708	8		77.125	5.69304	8		78.75	3.10529	8		77.5	3.54562	8
1.25% E-liquid and 0.3125% flavor in BHI	76.5	6.35085	4		74.5	8.88819	4		0	0	4		19.25	0.5	4		97.75	1.5	4
2.5% E-liquid and 0.625% flavor in BHI	49.5	1.73205	4		42.25	3.77492	4		0	0	4		19	0	4		57	3.91578	4
5% E-liquid and 1.25% flavor in BHI	29.5	1	4		18.25	0.5	4		0	0	4		18.5	0.57735	4		31.5	1.29099	4
	S. mitis at 8 hrs
	Tobacco				Menthol				Cinnamon				Strawberry				Blueberry
	Mean	SD	N		Mean	SD	N		Mean	SD	N		Mean	SD	N		Mean	SD	N
5% Flavorless E-liquid in BHI (control)	83.75	13.1849	12		83.75	13.1849	12		83.75	13.1849	12		83.75	13.1849	12		83.75	13.1849	12
1.25 % E-liquid and 0.0625% flavor in BHI	102.625	4.47014	8		103.375	6.50137	8		105.5	6.21059	8		105	6	8		101	3.38062	8
2.5% E-liquid and 0.125% flavor in BHI	104.5	3.0706	8		103.5	4.37526	8		108.625	6.90626	8		101.625	3.58319	8		99.25	5.49675	8
5% E-liquid and 0.25% flavor in BHI	96.75	2.96407	8		96.875	5.38351	8		96.5	4.17475	8		97.75	4.26782	8		99	3.25137	8
1.25% E-liquid and 0.3125% flavor in BHI	110	4.08248	4		110	6.97615	4		0	0	4		85	4.08248	4		122.5	13.3041	4
2.5% E-liquid and 0.625% flavor in BHI	94.25	6.94622	4		79.5	4.65475	4		0	0	4		83.25	1.5	4		124.5	5.74456	4
5% E-liquid and 1.25% flavor in BHI	56.75	3.59398	4		28.75	2.36291	4		0	0	4		3	0	4		60.75	8.26136	4
	S. oralis at 10 hrs
	Tobacco				Menthol				Cinnamon				Strawberry				Blueberry
	Mean	SD	N		Mean	SD	N		Mean	SD	N		Mean	SD	N		Mean	SD	N
5% Flavorless E-liquid in BHI (control)	63.0833	6.82853	12		63.0833	6.82853	12		63.0833	6.82853	12		63.0833	6.82853	12		63.0833	6.82853	12
1.25 % E-liquid and 0.0625% flavor in BHI	95.5	2.39046	8		97.625	2.92465	8		96	2.39046	8		95.625	2.50357	8		96.75	2.37547	8
2.5% E-liquid and 0.125% flavor in BHI	88.25	3.15096	8		89.75	1.83225	8		91.75	5.41822	8		88.375	1.40789	8		89.125	2.03101	8
5% E-liquid and 0.25% flavor in BHI	67.625	4.80885	8		69.25	8.10203	8		46.25	7.28501	8		70.625	6.13974	8		73	6.41427	8
1.25% E-liquid and 0.3125% flavor in BHI	101	2.58199	4		96.5	3	4		0	0	4		99.25	4.11299	4		91.25	5.5	4
2.5% E-liquid and 0.625% flavor in BHI	104.75	6.60177	4		96.5	3	4		0	0	4		85.75	0.957427	4		80.5	4.79583	4
5% E-liquid and 1.25% flavor in BHI	47.25	2.21736	4		17.75	0.5	4		0	0	4		7.25	0.5	4		34	1.41421	4
